# Supplementary material
Source: PubMed Central journal article supplement (PMC8852344)
Supplement: NIHMS1759987-supplement-Supplementary_Material.pdf [file NIHMS1759987-supplement-Supplementary_Material.pdf]

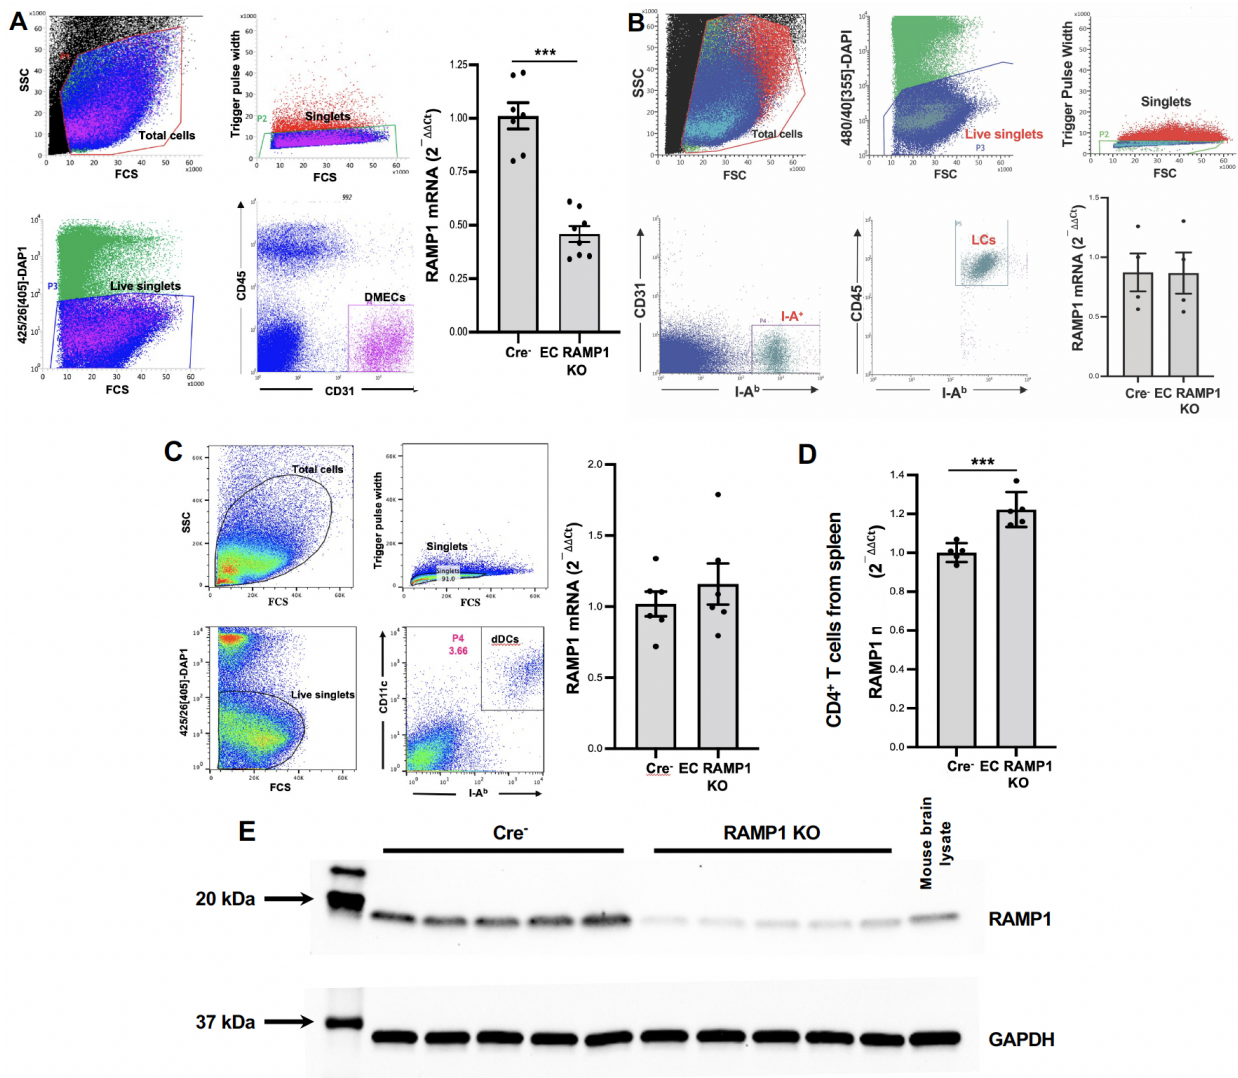

**Supplemental Fig. 1.** RAMP1 expression in DMECs from EC RAMP1 KO mice is deficient while it is not reduced in epidermal LCs, DDCs or CD4<sup>+</sup> T cells. Total RNA was extracted and qRT-PCR performed for RAMP1 for each group of cells described below. **(A)** DMECs were isolated from RAMP1 KO mice and Cre<sup>-</sup> mice. RAMP1 expression was greatly reduced in DMECs from EC RAMP1 KO mice vs. ECs from Cre<sup>-</sup> mice. N=7/group. **(B)** LCs were isolated from EC RAMP1 KO and Cre<sup>-</sup> mice. No difference in RAMP1 expression was observed between these 2 groups. N=4/group. **(C)** CD11c<sup>+</sup> DDCs were isolated from EC RAMP1 KO and Cre<sup>-</sup> mice. No difference in RAMP1 expression was observed between these 2 groups. N=6/group. **(D)** CD4<sup>+</sup> T cells were isolated from the spleens of EC RAMP1 KO and Cre<sup>-</sup> mice. RAMP1 expression was consistently slightly higher in CD4<sup>+</sup> T cells from EC RAMP1 KO mice vs. CD4<sup>+</sup> T cells from Cre<sup>-</sup> mice. N=5/group. Bars represent mean +/- SEM for all groups. \*\*\*p<0.001. FACS strategy for **A-C**: Total cells; then singlets; then live singlets; then sorting of CD31<sup>+</sup>, CD45<sup>-</sup> cells **(A)**, CD31<sup>-</sup>, CD45<sup>+</sup>, I-A<sup>+</sup> cells **(B)** or I-A<sup>+</sup>, CD11c<sup>+</sup> cells **(C)**. For **(D)**, CD4<sup>+</sup> T cells isolated from spleens by magnetic antibody techniques. Dots represent individual mouse values. **(E)** RAMP1 protein expression is greatly decreased in DMECs from EC RAMP1 KO mice compared to Cre<sup>-</sup> controls by Western blotting.

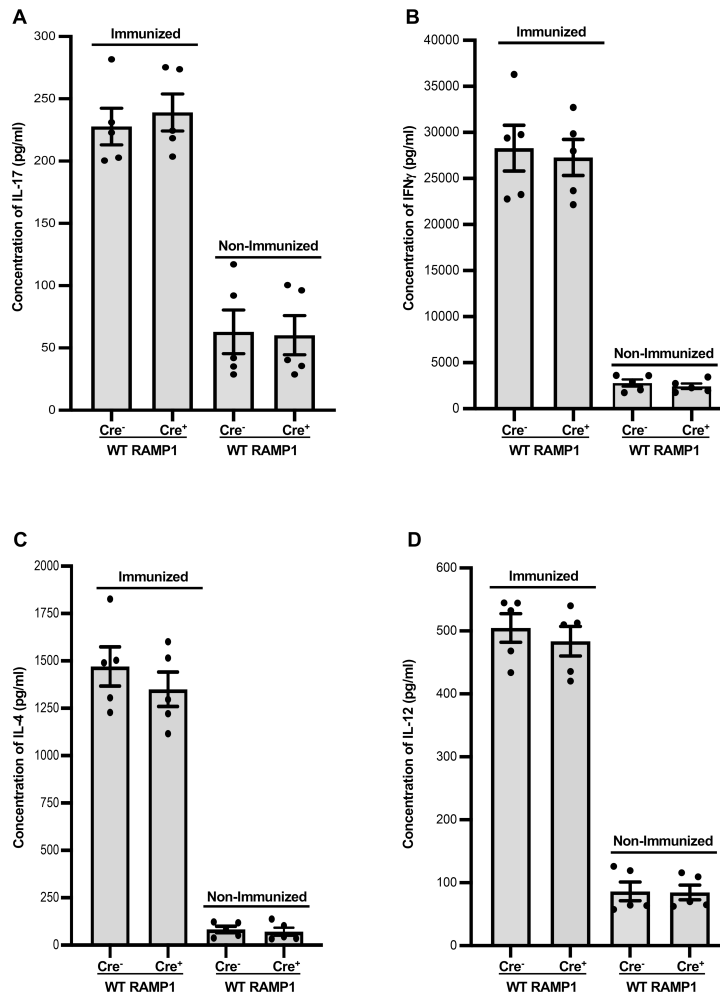

**Supplemental Fig. 2.** Mice expressing the wild-type RAMP1 alleles with VE-cadherin-CreER<sup>T2</sup> had no change in draining lymph node CD4<sup>+</sup> T cell production of cytokines after immunization. Mice expressing the wild-type RAMP-1 allele (Tm1c) without VE-cadherin-CreER<sup>T2</sup> and mice expressing the wild-type RAMP1 alleles with VE-cadherin-CreERT2 were immunized to DNFB or mock-immunized on the shaved dorsa. Three days later, mice were euthanized and draining lymph nodes harvested. A single-cell suspension of CD4<sup>+</sup> T cells from the draining lymph nodes was prepared and cells were placed in culture and stimulated with anti-CD3 and anti-CD28 monoclonal antibodies. Supernatants were harvested after 72-hours and assayed by ELISA for cytokine content. As shown, no difference in production of (A) IL-17A, (B) IFN- $\gamma$ , (C) IL-4 or (D) IL-22 was seen between Cre<sup>-</sup> and Cre<sup>+</sup> immunized mice. N=10/group, dots represent individual mouse values.

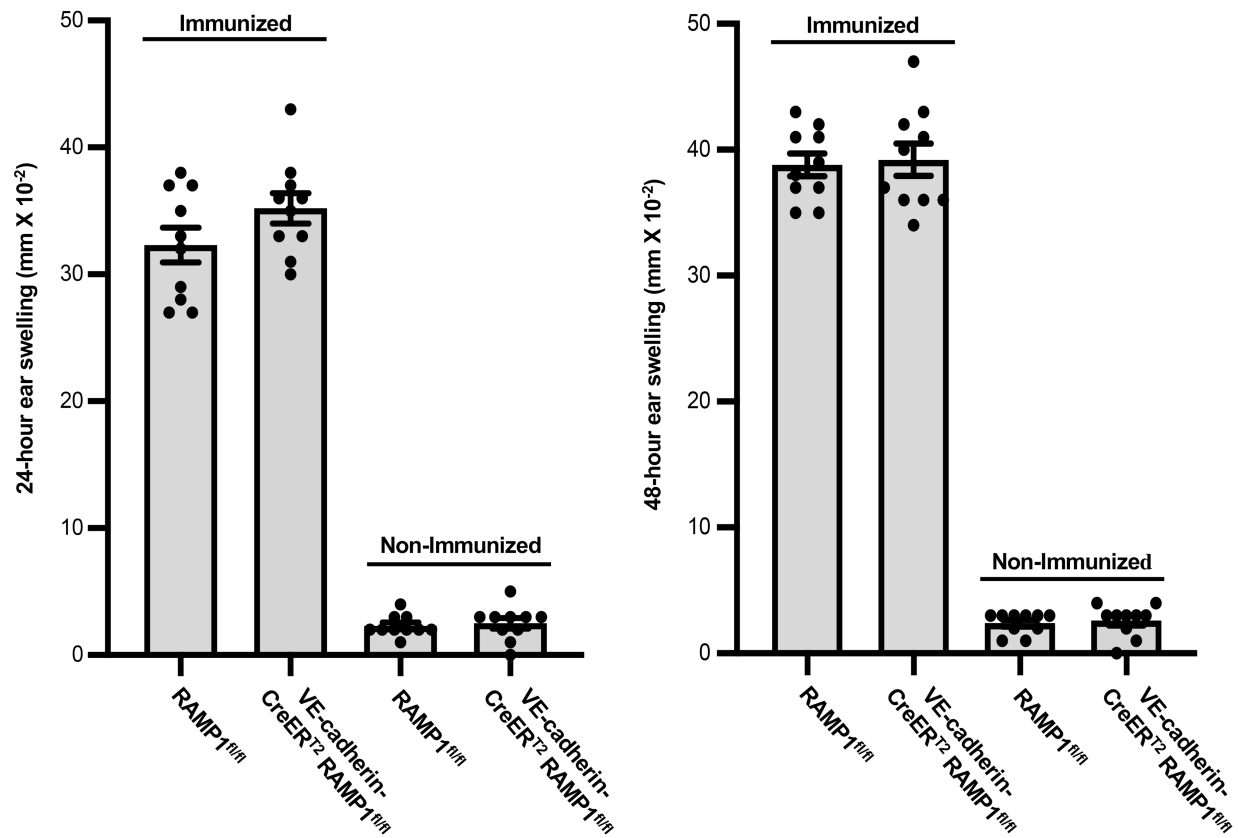

**Supplemental Fig. 3.** VE-cadherin-CreER<sup>T2</sup> RAMP1<sup>fl/fl</sup> mice treated with vehicle alone instead of Tx and immunized to DNFB showed no change in the CHS response compared to RAMP1<sup>fl/fl</sup> without Cre control mice also treated with vehicle alone. Groups of RAMP1<sup>fl/fl</sup> without Cre and VE-cadherin-CreER<sup>T2</sup> RAMP1<sup>fl/fl</sup> mice were treated with vehicle alone instead of Tx at age 2 and 3 weeks. After aging for several weeks, mice were immunized to DNFB by application of DNFB to the shaved dorsum or mock-immunized as described in Materials and Methods. Seven days later, mice were challenged by application of DNFB to the ears and the CHS response quantified by measurement of 24- and 48-hour ear swelling. As shown, there was no significant difference between the CHS response of immunized RAMP1<sup>fl/fl</sup> without Cre and VE-cadherin-CreER<sup>T2</sup> RAMP1<sup>fl/fl</sup> mice. Bars represent mean +/- SEM. N=5/group, dots represent individual mouse values.

**Supplemental Table 1.** Data set of blinded semi-quantitative evaluation of inflammatory infiltrate of histologic sections of ears challenged for contact hypersensitivity. *N=15; each slide rated on a 0 to 6 scale as described in the Materials and Methods for total infiltrate, neutrophil infiltrate and lymphocyte infiltrate.*

| Overall Infiltrate |            |                       |                |
|--------------------|------------|-----------------------|----------------|
| Immun EC RAMP1 KO  | Immun Cre- | Non-Immun EC RAMP1 KO | Non-Immun Cre- |
| 4                  | 6          | 1                     | 2              |
| 5                  | 6          | 1                     | 1              |
| 4                  | 6          | 1                     | 1              |
| 5                  | 6          | 1                     | 1              |
| 5                  | 6          | 1                     | 1              |
| 2                  | 3          | 1                     | 2              |
| 3                  | 4          | 1                     | 1              |
| 2                  | 4          | 1                     | 1              |
| 3                  | 4          | 3                     | 1              |
| 3                  | 4          | 1                     | 1              |
| 3                  | 5          | 1                     | 1              |
| 3                  | 5          | 2                     | 3              |
| 3                  | 5          | 2                     | 2              |
| 3                  | 5          | 2                     | 2              |
| 3                  | 5          | 1                     | 1              |

Mean: 3.40 4.93 1.33 1.40  
 Std Dev: 0.99 0.96 0.62 0.63  
 p<0.0002; Immun EC RAMP1 KO vs Immun Cre-

| Neutrophils       |            |                       |                |
|-------------------|------------|-----------------------|----------------|
| Immun EC RAMP1 KO | Immun Cre- | Non-Immun EC RAMP1 KO | Non-Immun Cre- |
| 0                 | 0          | 0                     | 0              |
| 0                 | 2          | 0                     | 0              |
| 0                 | 0          | 0                     | 0              |
| 0                 | 0          | 0                     | 0              |
| 0                 | 3          | 0                     | 0              |
| 2                 | 4          | 0                     | 0              |
| 1                 | 4          | 0                     | 0              |
| 2                 | 4          | 0                     | 1              |
| 4                 | 4          | 0                     | 0              |
| 2                 | 4          | 0                     | 0              |
| 0                 | 2          | 0                     | 0              |
| 2                 | 2          | 0                     | 0              |
| 0                 | 0          | 0                     | 0              |
| 0                 | 3          | 0                     | 0              |
| 0                 | 1          | 0                     | 0              |

0.87 2.20 0.00 0.07  
 1.25 1.66 0.00 0.26  
 p<0.02; Immun EC RAMP1 KO vs Immun Cre-

| Lymphocytes       |            |                       |                |
|-------------------|------------|-----------------------|----------------|
| Immun EC RAMP1 KO | Immun Cre- | Non-Immun EC RAMP1 KO | Non-Immun Cre- |
| 0                 | 1          | 0                     | 0              |
| 0                 | 2          | 0                     | 0              |
| 0                 | 3          | 0                     | 0              |
| 2                 | 2          | 2                     | 0              |
| 2                 | 3          | 0                     | 0              |
| 3                 | 3          | 1                     | 1              |
| 3                 | 3          | 1                     | 0              |
| 3                 | 2          | 0                     | 1              |
| 3                 | 2          | 0                     | 0              |
| 3                 | 3          | 0                     | 0              |
| 2                 | 3          | 0                     | 0              |
| 2                 | 3          | 1                     | 1              |
| 2                 | 2          | 1                     | 1              |
| 1                 | 3          | 1                     | 1              |
| 3                 | 3          | 0                     | 0              |

1.93 2.53 0.47 0.33  
 1.16 0.64 0.64 0.49  
 p=0.091; Immun EC RAMP1 KO vs Immun Cre-
